# Supplementary material for: Intraspecific variation in the cochleae of harbour porpoises (Phocoena phocoena) and its implications for comparative studies across odontocetes
Source: PeerJ. 2020 Apr 13;8:e8916. doi: 10.7717/peerj.8916 (PMC7161573; doi:10.7717/peerj.8916)
Supplement: Supplemental Information 1 — Table S4-Ecological data for each species of odontocete Table S5-References for ecological data from Table S4 [file peerj-08-8916-s001.xlsx]

## Sheet: Ecological category references
Table S4: Ecological data for each species of odontocete.
Habitat: riverine = > 50% of time spent in river, nearshore = > 50% of time spent in coastal waters, oceanic = > 50% of time spent in pelagic waters.
Diet: generalist = consumes a wide variety of prey types, fish = > 50% of diet is fish, cephalopods = > 50% of diet is cephalopods.
Feeding mode: raptorial = prey capture occurs mainly via snapping or ram feeding, suction = prey capture occurs mainly via suction, i.e. obligate suction feeders.
Dive type: shallow = maximum estimated dive depth less than 100m; mid = maximum estimated dive depth ~500m; deep = maximum estimated dive depth ~ 1000m; very deep = maximum estimated dive depth greater than 1000m.
Hearing type: NBHF = known or presumed to use narrow band high-frequency sonar; Type 2 = do not use NBHF.
Taxon	Habitat	Habitat ref	Diet	Diet ref	Feeding mode	Feeding mode ref	Dive type	Dive type ref	Hearing type	Hearing type ref
Berardius_arnuxii	oceanic	1	generalist	2	suction	37	deep	56	Type2	63
Cephalorhynchus_commersonii	nearshore	1	generalist	3,4,5	raptorial/suction	38	shallow	26	NBHF	63
Cephalorhynchus_heavisidii	nearshore	1	generalist	1,4,6	raptorial/suction	38	shallow	26	NBHF	63
Delphinapterus_leucas	nearshore/oceanic	1	fish	1,3,4,7,8,9,10	suction	37	mid	57	Type2	63
Delphinus_delphis	nearshore/oceanic	1	fish	3,4,6,10,11,12,13,14	raptorial	38	mid	26	Type2	63
Feresa_attenuata	oceanic	1	generalist	3,4,6	raptorial	38	deep	26	Type2	63
Globicephala_melas	nearshore/oceanic	1	generalist	1,3,5,6,15,16,17,18	suction	39,40	deep	26	Type2	63
Grampus_griseus	nearshore/oceanic	1	cephalopods	3,4,6,19,20,21	suction	39	deep	26	Type2	63
Hyperoodon_ampullatus	oceanic	1	generalist	2	suction	37	deep	56	Type2	63
Inia_geoffrensis	riverine	1	fish	4,8	raptorial	42,43	shallow	58	Type2	63
Kogia_breviceps	oceanic	1	generalist	3,6,8,16,18,22,23	suction	38	deep	59	NBHF	63
Kogia_sima	oceanic	1	cephalopods	3,6,8,16	suction	38	deep	59	NBHF	63
Lagenodelphis_hosei	oceanic	1	generalist	3,4,6,8,9,10,16,21,24	suction	41	deep	26	Type2	63
Lagenorhynchus_acutus	nearshore/oceanic	1	fish	1,4,7	raptorial/suction	38	mid	26	Type2	63
Lagenorhynchus_albirostris	nearshore/oceanic	1	fish	4	raptorial	26	mid	26	Type2	63
Lagenorhynchus_australis	nearshore	1	generalist	4,10	raptorial	26	shallow	26	NBHF	63
Lagenorhynchus_cruciger	oceanic	1	generalist	10	unknown	N/A	deep	26	NBHF	63
Lagenorhynchus_obliquidens	nearshore/oceanic	1	fish	1,3,4,10	raptorial	39	deep	26	Type2	63
Lagenorhynchus_obscurus	nearshore	1	generalist	4,6,9,10,25	raptorial	26	deep	26	Type2	63
Lipotes_vexillifer	riverine	1	fish	8	raptorial	44	shallow	44	Type2	63
Mesoplodon_bidens	oceanic	1	generalist	2	suction	37	deep	56	Type2	63
Mesoplodon_grayi	oceanic	1	generalist	2	suction	37	deep	56	Type2	63
Mesoplodon_hectori	oceanic	1	unknown	N/A	suction	37	deep	56	Type2	63
Mesoplodon_mirus	oceanic	1	generalist	2	suction	37	deep	56	Type2	63
Monodon_monoceros	nearshore/oceanic	1	generalist	3,4,8,9,10	suction	41	deep	57	Type2	63
Neophocaena_phocaenoides	nearshore	1	generalist	3,4,8	suction	41	shallow	49	NBHF	63
Orcaella_brevirostris	riverine/nearshore	1	generalist	26	suction	41	shallow	26	Type2	63
Orcinus_orca	nearshore/oceanic	1	generalist	3,4,7,8,9,10,16,27	raptorial/suction	45,46,47,48	shallow	26	Type2	63
Peponocephala_electra	oceanic	1	generalist	6,8,10	suction	49	deep	26	Type2	63
Phocoena_dioptrica	nearshore/oceanic	1	generalist	1,26	suction	49	mid	49	NBHF	63
Phocoena_phocoena	nearshore/oceanic	1	generalist	4,7,8,9,10,20,28	suction	50	shallow	49	NBHF	63
Phocoena_sinus	nearshore	1	generalist	1,8	suction	49	shallow	49	NBHF	63
Phocoena_spinipinnis	nearshore	1	generalist	1,8,9	suction	41	shallow	49	NBHF	63
Phocoenoides_dalli	nearshore/oceanic	1	generalist	3,8,9,10	suction	1	deep	49	NBHF	63
Physeter_macrocephalus	oceanic	1	generalist	26	suction	51	deep	60	Type2	63
Platanista_gangetica	riverine	1	fish	1,26	raptorial	39,52	shallow	61	Type2	63
Pontoporia_blainvillei	nearshore	1	fish	3,4,9,10	raptorial	41	shallow	62	NBHF	63
Pseudorca_crassidens	nearshore/oceanic	1	generalist	1,3,4,6,8,10,29	raptorial/suction	41,53	deep	26	Type2	63
Sotalia_fluviatilis	riverine	1	fish	1,9,10,30	raptorial	26	shallow	26	Type2	63
Sotalia_guianensis	nearshore	1	generalist	26	raptorial	26	shallow	26	Type2	63
Sousa_chinensis	nearshore	1	fish	8,10,31	raptorial	54	shallow	26	Type2	63
Stenella_attenuata	nearshore/oceanic	1	generalist	4,8,10,32	raptorial	38	mid	26	Type2	63
Stenella_coeruleoalba	oceanic	1	generalist	26	raptorial	38	deep	26	Type2	63
Stenella_longirostris	nearshore/oceanic	1	fish	3,9,19,33	raptorial	38	shallow	26	Type2	63
Steno_bredanensis	nearshore/oceanic	1	generalist	1,3,4,8,13,16	raptorial	26	shallow	26	Type2	63
Tasmacetus_shepherdi	oceanic	1	generalist	2	suction	37	deep	56	Type2	63
Tursiops_aduncus	nearshore	1	generalist	10	raptorial	55	mid	26	Type2	63
Tursiops_truncatus	nearshore/oceanic	1	generalist	3,4,6,9,13,16,20,34,35,36	raptorial	55	mid	26	Type2	63
Ziphius_cavirostris	oceanic	1	cephalopods	2	suction	37	deep	56	Type2	63

## Sheet: Reference list
Table S5: References for ecological data in Table S4
Ref no	Reference
1	Jefferson T.A., Webber M.A., Pitman R.L. 2015 Marine Mammals of the World: A Comprehensive Guide to Their Identification: A Comprehensive Guide to Their Identification (2nd ed), Academic Press.
2	MacLeod, C.D., Santos, M.B. and Pierce, G.J., 2003. Review of data on diets of beaked whales: evidence of niche separation and geographic segregation. Journal of the Marine Biological Association of the United Kingdom, 83(3), pp.651-665.
3	Wood J., Day C. 2002 CephBase. A database-driven web site on all living cephalopods (octopus, squid, cuttlefish and nautilus).
4	Culik B.M. 2004 Review of small cetaceans. Distribution, Behaviour, Migration and Threats Regional Seas Reports and Studies 177.
5	Clarke M., Goodall N. 1994 Cephalopods in the diets of three odontocete cetacean species stranded at Tierra del Fuego, Globicephala melaena (Traill, 1809), Hyperoodon planifrons Flower, 1882 and Cephalorhynchus commersonii (Lacepede, 1804). Antarctic Science 6(02), 149-154.
6	Sekiguchi K., Klages N., Best P. 1992 Comparative analysis of the diets of smaller odontocete cetaceans along the coast of southern Africa. South African Journal of Marine Science 12(1), 843-861
7	Gaskin D.E. 1982 Ecology of whales and dolphins. London, Heinemann.
8	Hayssen V. 2014 Mammalian Species Complete Systematic List of Accounts.
9	Froese R.a.D.P. 2015 FishBase.
10	Wursig B., Thewissen J.G.M., Kovacs, K.M. 2018 Encyclopedia of marine mammals(3rd ed). San Diego, Academic Press.
11	Hassani S., Antoine L., Ridoux V. 1997 Diets of albacore, Thunnus alalunga, and dolphins, Delphinus delphis and Stenella coerulaeoalba, caught in the northeast Atlantic albacore drift-net fishery: a progress report. Journal of Northwest Atlantic Fishery Science 22, 119-123
12	Silva M. 1999 Diet of common dolphins, Delphinus delphis, off the Portuguese continental coast. Journal of the Marine Biological Association of the UK 79(03), 531-540.
13	Melo C., Santos R., Bassoi M., Araújo A., Lailson-Brito J., Dorneles P., Azevedo A. 2010 Feeding habits of delphinids (Mammalia: Cetacea) from Rio de Janeiro state, Brazil. Journal of the Marine Biological Association of the United Kingdom 90(08), 1509-1515.
14	Young D.D., Cockcroft V. 1994 Diet of common dolphins (Delphinus delphis) off the south‐east coast of southern Africa: opportunism or specialization? Journal of Zoology 234(1), 41-53.
15	Beatson E., O'Shea S., Ogle M. 2007 First report on the stomach contents of long‐finned pilot whales, Globicephala melas, stranded in New Zealand.
16	dos Santos R.A., Haimovici M. 2001 Cephalopods in the diet of marine mammals stranded or incidentally caught along southeastern and southern Brazil (21–34 S). Fisheries Research 52(1), 99-112.
17	Santos M.B., Monteiro S.S., Vingada J.V., Ferreira M., López A., Martínez Cedeira J.A., Reid R.J., Brownlow A., Pierce G.J. 2014 Patterns and trends in the diet of long‐finned pilot whales (Globicephala melas) in the northeast Atlantic. Marine Mammal Science 30(1), 1-19.
18	Spitz J., Cherel Y., Bertin S., Kiszka J., Dewez A., Ridoux V. 2011 Prey preferences among the community of deep-diving odontocetes from the Bay of Biscay, Northeast Atlantic. Deep Sea Research Part I: Oceanographic Research Papers 58(3), 273-282.
19	Clarke M., Young R. 1998 Description and analysis of cephalopod beaks from stomachs of six species of odontocete cetaceans stranded on Hawaiian shores. Journal of the Marine Biological Association of the United Kingdom 78(02), 623-641.
20	González A., López A., Guerra A., Barreiro A. 1994 Diets of marine mammals stranded on the northwestern Spanish Atlantic coast with special reference to Cephalopoda. Fisheries Research 21(1), 179-191.
21	Wang M.C., Shao K.T., Huang S.L., Chou L.S. 2012 Food partitioning among three sympatric odontocetes (Grampus griseus, Lagenodelphis hosei, and Stenella attenuata). Marine Mammal Science 28(2), E143-E157.
22	Beatson E. 2007 The diet of pygmy sperm whales, Kogia breviceps, stranded in New Zealand: implications for conservation. Reviews in Fish Biology and Fisheries 17(2-3), 295-303.
23	West K.L., Walker W.A., Baird R.W., White W., Levine G., Brown E., Schofield D. 2009 Diet of pygmy sperm whales (Kogia breviceps) in the Hawaiian Archipelago. Marine Mammal Science 25(4), 931-943.
24	Canning S.J., Santos M.B., Reid R.J., Evans P.G., Sabin R.C., Bailey N., Pierce G.J. 2008 Seasonal distribution of white-beaked dolphins (Lagenorhynchus albirostris) in UK waters with new information on diet and habitat use. Journal of the Marine Biological Association of the UK 88(06), 1159-1166.
25	Alonso M.K., Crespo E.A., Garcia N.A., Pedraza S.N., Coscarella M.A. 1998 Diet of dusky dolphins. Fishery Bulletin 96, 366-374.
26	Wang J.Y., Riehl K.N., Dungan S.Z. 2014 Family Delphinidae (Ocean Dolphins). Pp. 410-527 in: Wilson D.E., Mittermeier R.A. eds. 2014. Handbook of the mammals of the world. Vol 4. Sea Mammals. Lynx Edicions, Barcelona
27	Ford J.K., Ellis G.M., Barrett-Lennard L.G., Morton A.B., Palm R.S., Balcomb III K.C. 1998 Dietary specialization in two sympatric populations of killer whales (Orcinus orca) in coastal British Columbia and adjacent waters. Canadian Journal of Zoology 76(8), 1456-1471.
28	Santos M., Pierce G., Learmonth J., Reid R., Ross H., Patterson I., Reid D., Beare D. 2004 Variability in the diet of harbor porpoises (Phocoena phocoena) in Scottish waters 1992–2003. Marine Mammal Science 20(1), 1-27.
29	Alonso M.K., Pedraza S.N., Schiavini A., Goodall R.N.P., Crespo E.A. 1999 Stomach contents of false killer whales (Pseudorca crassidens) stranded on the coasts of the Strait of Magellan, Tierra del Fuego. Marine Mammal Science 15(3), 712-724.
30	de Oliveira Santos M.C., Rosso S., dos Santos R.A., Lucato S., Bassoi M. 2002 Insights on small cetacean feeding habits in southeastern Brazil. Aquatic Mammals 28(1), 38-45.
31	Barros N.B., Jefferson T.A., Parsons E. 2004 Feeding habits of Indo-Pacific humpback dolphins (Sousa chinensis) stranded in Hong Kong. Aquatic Mammals 30(1), 179-188.
32	Wang M.-C., Walker W.A., Shao K.-T., Chou L.-S. 2003 Feeding habits of the pantropical spotted dolphin, Stenella attenuata, off the eastern coast of Taiwan. Zoological studies- Taipei 42(2), 368-378.
33	Dolar M., Walker W.A., Kooyman G.L., Perrin W.F. 2003 Comparative feeding ecology of spinner dolphins (Stenella longirostris) and Fraser's dolphins (Lagenodelphis hosei) in the Sulu Sea. Marine Mammal Science 19(1), 1-19.
34	Heithaus M.R. 2001 Predator–prey and competitive interactions between sharks (order Selachii) and dolphins (suborder Odontoceti): a review. Journal of Zoology 253(01), 53-68.
35	Barros N.B., Wells R.S. 1998 Prey and feeding patterns of resident bottlenose dolphins (Tursiops truncatus) in Sarasota Bay, Florida. Journal of Mammalogy 79(3), 1045-1059.
36	Gannon D.P., Waples D.M. 2004 Diets of coastal bottlenose dolphins from the US mid-Atlantic coast differ by habitat. Marine Mammal Science 20(3), 527-545.
37	Heyning J.E., Mead J.G. 1996 Suction feeding in beaked whales: morphological and observational evidence. Contributions in Science, Natural History Museum of Los Angeles County 464, 1–12.
38	Johnston, C. and Berta, A., 2011. Comparative anatomy and evolutionary history of suction feeding in cetaceans. Marine Mammal Science, 27(3), pp.493-513.
39	Kane E.A., Marshall C.D. 2009 Comparative feeding kinematics and performance of odontocetes: belugas, Pacific white-sided dolphins and long-finned pilot whales. J Exp Biol 212(24), 3939-3950. (doi:10.1242/jeb.034686).
40	Werth A. 2000 A kinematic study of suction feeding and associated behavior in the long-finned pilot whale, Globicephala melas (Traill). Mar Mamm Sci 16(2), 299-314.
41	Werth A.J. 2006 Mandibular and dental variation and the evolution of suction feeding in Odontoceti. J Mammal 87(3), 579-588.
42	Layne J.N. 1959 Feeding adaptations and behavior of a freshwater dolphin, Inia geoffrensis. Anat Rec 134, 598.
43	Sylvestre J.-P. 1985 Some observations on behaviour of two Orinoco Dolphins (lnia geoffrensis humboldtiana, (Pilleri and Gihr 1977), in captivity, at Duisburg Zoo. Aquat Mamm 11, 58-65.
44	Smith B.D. 2014 Family Lipotidae (Baiji). Pp. 380-385 in: Wilson D.E., Mittermeier R.A. eds. 2014. Handbook of the mammals of the world. Vol 4. Sea Mammals. Lynx Edicions, Barcelona
45	Pitman R.L., Durban J.W. 2012 Cooperative hunting behavior, prey selectivity and prey handling by pack ice killer whales (Orcinus orca), type B, in Antarctic Peninsula waters. Mar Mamm Sci 28(1), 16-36.
46	Gladstone W. 1988 Killer whale feeding observed underwater. J Mammal 69, 629-630.
47	Visser I.N., Berghan J., van Meurs R., Fertl D. 2000 Killer whale (Orcinus orca) predation on a shortfin mako shark (Isurus oxyrinchus) in New Zealand waters. Aquat Mamm 26, 229-
48	Donaldson B.J.P.I., VoL 3. (ed.). Academic Press, New York. 1977 The tongue of the bottlenosed dolphin (Tursiops truncatus). In Functional Anatomy of Marine Mammals (ed. Harrison R.J.), pp. 175-197. Academic Press, New York.
49	Jefferson T.A. 2014 Family Phocoenidae (Porpoises). Pp. 528-547 in: Wilson D.E., Mittermeier R.A. eds. 2014. Handbook of the mammals of the world. Vol 4. Sea Mammals. Lynx Edicions, Barcelona
50	Kastelein R.A., Staal C., Terlouw A., Muller M. 1997 Pressure changes in the mouth of a feeding harbour porpoise (Phocoena phocoena). In The Biology of the Harbour Porpoise (eds. Read A.J., Wiepkema P.R., Nachtigall P.E.), pp. 279-291. Woerden, De Spil Publishers.
51	Werth A.J. 2004 Functional morphology of the sperm whale (Physeter macrocephalus) tongue, with reference to suction feeding. Aquat Mamm 30, 405-418.
52	Pilleri G., Gihr M., Purves P.E., Zbinden K., Kraus C. 1976 Ethology and bioacoustics of the Indus River dolphin (Platanista indi) in captivity. Investig Cetacea 6, 13-69.
53	Watson L. 1981. Sea guide to whales of the world. E.P. Dutton, New York.
54	Barros N.B., Jefferson T.A., Parsons E. 2004 Feeding habits of Indo-Pacific humpback dolphins (Sousa chinensis) stranded in Hong Kong. Aquatic Mammals 30(1), 179-188
55	Bloodworth B., Marshall C.D. 2005 Feeding kinematics of Kogia and Tursiops (Odontoceti: Cetacea): characterization of suction and ram feeding. The Journal of Experimental Biology 208(Pt 19), 3721-3730. (doi:10.1242/jeb.01807).
56	MacLeod C.D. 2014 Family Ziphiidae (Beaked whales). Pp. 326-357 in: Wilson D.E., Mittermeier R.A. eds. 2014. Handbook of the mammals of the world. Vol 4. Sea Mammals. Lynx Edicions, Barcelona
57	Richard P.R. 2014 Family Monodontidae (Narwhal and beluga). Pp. 394-409 in: Wilson D.E., Mittermeier R.A. eds. 2014. Handbook of the mammals of the world. Vol 4. Sea Mammals. Lynx Edicions, Barcelona
58	da Silva V.M.F., Martin A.R. 2014 Family Iniidae (Amazon river dolphins). Pp. 364-379 in: Wilson D.E., Mittermeier R.A. eds. 2014. Handbook of the mammals of the world. Vol 4. Sea Mammals. Lynx Edicions, Barcelona
59	McAlpine D.F. 2014 Family Kogiidae (Pygmy and dwarf sperm whales). Pp. 318-325 in: Wilson D.E., Mittermeier R.A. eds. 2014. Handbook of the mammals of the world. Vol 4. Sea Mammals. Lynx Edicions, Barcelona
60	Mesnick S.L. 2014 Family Physeteridae (Sperm whale). Pp. 300-317 in: Wilson D.E., Mittermeier R.A. eds. 2014. Handbook of the mammals of the world. Vol 4. Sea Mammals. Lynx Edicions, Barcelona
61	Braulik G.T. 2014 Family Platanistidae (South Asian river dolphin). Pp. 358-363 in: Wilson D.E., Mittermeier R.A. eds. 2014. Handbook of the mammals of the world. Vol 4. Sea Mammals. Lynx Edicions, Barcelona
62	Secchi E.R. 2014 Family Pontoporiidae (Franciscana). Pp. 386-393 in: Wilson D.E., Mittermeier R.A. eds. 2014. Handbook of the mammals of the world. Vol 4. Sea Mammals. Lynx Edicions, Barcelona
63	Galatius A., Olsen M.T., Steeman M.E., Racicot R.A., Bradshaw C.D., Kyhn L.A., Miller, L.A. 2018. Raising your voice: evolution of narrow-band high-frequency signals in toothed whales (Odontoceti). Biological Journal of the Linnean Society, 126, 213-224.
